# Supplementary material for: Stretching of the retinal pigment epithelium contributes to zebrafish optic cup morphogenesis
Source: eLife. 2021 Sep 21;10:e63396. doi: 10.7554/eLife.63396 (PMC8530511; doi:10.7554/eLife.63396)
Supplement: Figure 2—source data 1. [file elife-63396-fig2-data1.xlsx]

## Sheet: Figure 2F
Figure 2F
Apical surface area in µm2
Progenitors	NR	RPE
50.086	18.858	323.752
44.067	24.689	277.351
43.079	25.62	385.971
44.54	20.719	414.196
36.103	22.704	361.158
43.547	21.65	261.036
32.133	23.076	261.098
41.997	21.588	295.278
53.629	17.679	292.859
60.793	24.999	338.453
45.346	20.781	292.859
55.83	20.099	579.205
48.014	27.046	498.685
49.068	16.873
39.639	27.605
32.505	21.091
47.642	21.401
35.979	25.123
33.498	24.007
42.803	20.719
20	20	13	N
