# Supplementary material for: Stretching of the retinal pigment epithelium contributes to zebrafish optic cup morphogenesis
Source: eLife. 2021 Sep 21;10:e63396. doi: 10.7554/eLife.63396 (PMC8530511; doi:10.7554/eLife.63396)
Supplement: Figure 3—figure supplement 1—source data 1. [file elife-63396-fig3-figsupp1-data1.xlsx]

## Sheet: Figure S1
Figure S1B
stage (hpf)	GFP volume (um^3) --> (green bars)	Deleted volume (um^3) --> (cyan bars)	RPE volume (um^3) --> black dots and line
17	28975.5	0	28975.5
17.0786	28798.8	0	28798.8
17.1572	28989.2	0	28989.2
17.2358	30844.2	0	30844.2
17.3144	29469.7	0	29469.7
17.393	31792.6	0	31792.6
17.4716	33829	0	33829
17.5502	35213.6	0	35213.6
17.6288	32838.5	0	32838.5
17.7074	33545.3	0	33545.3
17.7913	28948.1	0	28948.1
17.8751	30525.7	0	30525.7
17.959	27444.3	0	27444.3
18.0429	27905.3	0	27905.3
18.1268	26616.3	0	26616.3
18.2106	26584.6	0	26584.6
18.2945	28835.2	0	28835.2
18.3784	28244.5	0	28244.5
18.4622	30117.9	0	30117.9
18.5461	30434.4	0	30434.4
18.6294	31798.4	2075.48	29722.9
18.7128	32001.4	1804.38	30197.1
18.7961	30193.9	2335.51	27858.4
18.8794	33290.5	3907.28	29383.2
18.9628	32980.4	3596.62	29383.7
19.0461	31568.4	2658.3	28910.1
19.1295	33197.7	3661.5	29536.2
19.2128	32805.3	2566.53	30238.7
19.2961	32592.2	3369.82	29222.3
19.3795	32788.9	3317.08	29471.8
19.464	33051.6	3720.57	29331
19.5486	35191.9	4135.67	31056.3
19.6331	37590.7	4739.59	32851.1
19.7177	37045.4	5118.82	31926.5
19.8022	37197.8	5262.28	31935.5
19.8868	37905.6	5923.16	31982.4
19.9713	35594.4	4924.19	30670.2
20.0559	37928.8	4493.8	33435
20.1404	37940.4	5401	32539.4
20.225	41303.9	7086.7	34217.2
20.3093	42969	16678.2	26290.8
20.3936	47205.5	19127.1	28078.3
20.4779	46381.1	17662.9	28718.1
20.5622	50045.7	18761.1	31284.6
20.6466	49293.1	18916.7	30376.4
20.7309	50674.4	21100.8	29573.6
20.8152	52783.7	20627.7	32156
20.8995	52202.4	21829.7	30372.7
20.9838	53590.7	22581.9	31008.8
21.0681	52953	22812.9	30140.1
21.1518	53943	23442.1	30500.9
21.2355	55038.5	24076.1	30962.4
21.3193	57070.2	24833	32237.2
21.403	55147.1	23341.9	31805.2
21.4867	55037.4	22914.7	32122.7
21.5704	56219.9	24114.1	32105.9
21.6541	56151.4	24174.2	31977.2
21.7379	57759	25078.2	32680.8
21.8216	58701	25243.3	33457.7
21.9053	62273.9	26350.4	35923.5
