# Supplementary material for: Stretching of the retinal pigment epithelium contributes to zebrafish optic cup morphogenesis
Source: eLife. 2021 Sep 21;10:e63396. doi: 10.7554/eLife.63396 (PMC8530511; doi:10.7554/eLife.63396)
Supplement: Figure 3—source data 1. [file elife-63396-fig3-data1.xlsx]

## Sheet: Figure 3B, C, D, G
Figure 3B
stage (hpf)	RPE_thickness_(um) * 10^3
17	24.9823
17.0786	21.9988
17.1572	21.8625
17.2358	22.1595
17.3144	21.7999
17.393	21.8239
17.4716	23.1044
17.5502	22.4189
17.6288	20.9841
17.7074	21.3712
17.7913	19.5315
17.8751	20.7587
17.959	17.5551
18.0429	17.6591
18.1268	17.5892
18.2106	17.4105
18.2945	17.3554
18.3784	16.8078
18.4622	17.1015
18.5461	16.6098
18.6294	16.2214
18.7128	15.5491
18.7961	13.641
18.8794	14.6564
18.9628	14.201
19.0461	13.679
19.1295	13.8337
19.2128	13.7189
19.2961	13.533
19.3795	13.6351
19.464	13.58
19.5486	14.1575
19.6331	13.6498
19.7177	13.5264
19.8022	13.4731
19.8868	13.3093
19.9713	13.4948
20.0559	15.1327
20.1404	15.1357
20.225	14.8897
20.3093	13.0968
20.3936	12.9683
20.4779	13.4507
20.5622	14.0057
20.6466	13.8044
20.7309	14.3843
20.8152	14.1847
20.8995	14.3104
20.9838	15.0669
21.0681	15.3987
21.1518	14.2962
21.2355	14.374
21.3193	14.5907
21.403	15.1739
21.4867	14.9712
21.5704	16.0609
21.6541	16.7478
21.7379	17.6377
21.8216	16.8304
21.9053	17.9374
Figure 3C
stage (hpf)	RPE_surface_(um2) * 10^2
17	1159.84
17.0786	1309.11
17.1572	1325.98
17.2358	1391.92
17.3144	1351.83
17.393	1456.78
17.4716	1464.18
17.5502	1570.71
17.6288	1564.92
17.7074	1569.65
17.7913	1482.12
17.8751	1470.5
17.959	1563.33
18.0429	1580.22
18.1268	1513.22
18.2106	1526.93
18.2945	1661.45
18.3784	1680.44
18.4622	1761.13
18.5461	1832.32
18.6294	1832.33
18.7128	1942.04
18.7961	2042.25
18.8794	2004.81
18.9628	2069.14
19.0461	2113.46
19.1295	2135.09
19.2128	2204.17
19.2961	2159.34
19.3795	2161.46
19.464	2159.87
19.5486	2193.62
19.6331	2406.71
19.7177	2360.31
19.8022	2370.32
19.8868	2403.02
19.9713	2272.74
20.0559	2209.45
20.1404	2149.84
20.225	2298.05
20.3093	2007.43
20.3936	2165.15
20.4779	2135.07
20.5622	2233.71
20.6466	2200.48
20.7309	2055.96
20.8152	2266.94
20.8995	2122.42
20.9838	2058.08
21.0681	1957.32
21.1518	2133.5
21.2355	2154.06
21.3193	2209.44
21.403	2096.05
21.4867	2145.64
21.5704	1999.01
21.6541	1909.34
21.7379	1852.89
21.8216	1987.93
21.9053	2002.71
Figure 3D
stage (hpf)	RPE_volume_(um3) * 10^3
17	28975.5
17.0786	28798.8
17.1572	28989.2
17.2358	30844.2
17.3144	29469.7
17.393	31792.6
17.4716	33829
17.5502	35213.6
17.6288	32838.5
17.7074	33545.2
17.7913	28948.1
17.8751	30525.7
17.959	27444.3
18.0429	27905.3
18.1268	26616.3
18.2106	26584.6
18.2945	28835.2
18.3784	28244.5
18.4622	30117.9
18.5461	30434.4
18.6294	29722.9
18.7128	30197.1
18.7961	27858.4
18.8794	29383.2
18.9628	29383.8
19.0461	28910.1
19.1295	29536.2
19.2128	30238.7
19.2961	29222.4
19.3795	29471.8
19.464	29331
19.5486	31056.3
19.6331	32851.1
19.7177	31926.5
19.8022	31935.5
19.8868	31982.5
19.9713	30670.2
20.0559	33435
20.1404	32539.4
20.225	34217.2
20.3093	26290.8
20.3936	28078.3
20.4779	28718.1
20.5622	31284.6
20.6466	30376.4
20.7309	29573.6
20.8152	32156
20.8995	30372.7
20.9838	31008.8
21.0681	30140.1
21.1518	30500.9
21.2355	30962.4
21.3193	32237.2
21.403	31805.2
21.4867	32122.7
21.5704	32105.9
21.6541	31977.2
21.7379	32680.8
21.8216	33457.7
21.9053	35923.5
Figure 3G
stages (hpf) Movie S1-2	vol_GFP_movieS1-2	vol_rx3_movieS1-2	stage (hpf) Movie S3	vol_GFP_movieS1-2	vol_rx3_movieS1-2
17	30621.6	1.17738e+06	24	76503.3	1.96486e+06
17.0786	30436	1.2053e+06	24.3158	84801.8	1.7823e+06
17.1572	30638	1.20912e+06	24.6316	81614.6	1.9168e+06
17.2358	32461.4	1.16416e+06	24.9474	84323.3	1.93216e+06
17.3144	31280.4	1.22692e+06	25.2632	84089.4	1.95779e+06
17.393	33533.7	1.18952e+06	25.5789	82542.7	1.96882e+06
17.4716	36575.4	1.21883e+06	25.8947	86930.4	2.23585e+06
17.5502	37923	1.19251e+06	26.2105	87966.7	1.99588e+06
17.6288	35758.9	1.20506e+06	26.5263	85139	1.99589e+06
17.7074	36176.1	1.22925e+06	26.8421	90843.7	2.00101e+06
17.7913	32081.6	1.18177e+06	27.1579	89828.8	2.08102e+06
17.8751	33169.2	1.21878e+06	27.4737	89358.1	2.05727e+06
17.959	29841.6	1.20309e+06	27.7895	92630.1	2.35283e+06
18.0429	29777.2	1.2525e+06	28.1053	94324.3	2.1163e+06
18.1268	28689.6	1.22685e+06	28.4211	93068.5	2.15604e+06
18.2106	29326.8	1.25088e+06	28.7368	95445.8	2.16951e+06
18.2945	31432.9	1.24421e+06	29.0526	96529.7	2.12929e+06
18.3784	30869	1.23065e+06	29.3684	96396.2	2.12802e+06
18.4622	32528.3	1.23965e+06	29.6842	94161.9	2.34201e+06
18.5461	33140.2	1.19558e+06	30	97064.4	2.14651e+06
18.6294	34361.2	1.21542e+06	30.3182	97243.8	2.17004e+06
18.7128	34701.4	1.25579e+06	30.6364	99327.3	2.19294e+06
18.7961	33189.8	1.24288e+06	30.9545	96244.6	2.1914e+06
18.8794	34868.6	1.23705e+06	31.2727	96105.3	2.18916e+06
18.9628	34690.9	1.24106e+06	31.5909	98198.7	2.42308e+06
19.0461	34249.4	1.29114e+06	31.9091	100293	2.20432e+06
19.1295	35400.3	1.24765e+06	32.2273	100341	2.19783e+06
19.2128	35593.3	1.2969e+06	32.5455	98426	2.22559e+06
19.2961	35114.9	1.30035e+06	32.8636	99341.3	2.27333e+06
19.3795	35444	1.29843e+06	33.1818	101737	2.26222e+06
19.464	35631.3	1.23284e+06	33.5	98132.2	2.34965e+06
19.5486	37532.7	1.31017e+06	33.8182	100597	2.34778e+06
19.6331	38689.9	1.29253e+06	34.1364	101510	2.39089e+06
19.7177	39374.5	1.33124e+06	34.4545	97750	2.3712e+06
19.8022	39242.1	1.28416e+06	34.7727	97333.8	2.39526e+06
19.8868	40318.1	1.35182e+06	35.0909	96126.4	2.33445e+06
19.9713	37923	1.28713e+06	35.4091	93125.9	2.44791e+06
20.0559	40604.5	1.32868e+06	35.7273	98805.8	2.34318e+06
20.1404	40375.6	1.37568e+06	36.0455	98314.4	2.33062e+06
20.225	43895.2	1.35725e+06	36.3636	92883.4	2.31078e+06
20.3093	45472.3	1.35298e+06	36.6818	91356.9	2.33113e+06
20.3936	49654.9	1.32993e+06	37	97007.8	2.30578e+06
20.4779	49572.1	1.41161e+06
20.5622	53195.6	1.42571e+06
20.6466	52312.1	1.39688e+06
20.7309	53805.8	1.42115e+06
20.8152	56360.8	1.42486e+06
20.8995	55927.2	1.42889e+06
20.9838	56711.5	1.38841e+06
21.0681	56903	1.42693e+06
21.1518	57942.6	1.40822e+06
21.2355	58919.4	1.37467e+06
21.3193	60087.1	1.42374e+06
21.403	59753.8	1.44582e+06
21.4867	60324.5	1.44754e+06
21.5704	61643.6	1.39013e+06
21.6541	61463.8	1.39687e+06
21.7379	62473.8	1.40786e+06
21.8216	63966.5	1.33802e+06
21.9053	67883.3	1.45507e+06
