# Supplementary material for: Stretching of the retinal pigment epithelium contributes to zebrafish optic cup morphogenesis
Source: eLife. 2021 Sep 21;10:e63396. doi: 10.7554/eLife.63396 (PMC8530511; doi:10.7554/eLife.63396)
Supplement: Figure 4—source data 1. [file elife-63396-fig4-data1.xlsx]

## Sheet: Figure 4K, L, M, N
Figure 4K
Azidoblebbistatin experiments			RPE	A-B length in µm
DMSO	Irradiated eye	Non-irradiated eye	I/NI	ABlebPhenotype	Irradiated eye	Non-irradiated eye	I/NI
1	3.713	3.379	1.09885	1	7.726	4.565	1.69244
2	2.716	3.418	0.794617	2	6.685	3.89	1.71851
3	4.43	2.699	1.64135	3	7.186	4.358	1.64892
4	3.651	4.151	0.879547	4	5.531	4.879	1.13363
5	4.467	4.875	0.916308	5	6.523	3.604	1.80993
6	4.33	3.88	1.11598	6	6.685	4.274	1.56411
7	3.086	3.222	0.95779	7	7.382	3.822	1.93145
8	4.983	3.45	1.44435	8	5.658	3.987	1.41911
9	3.313	3.806	0.870468	9	6.646	5.031	1.32101
10	5.477	5.462	1.00275	10	6.509	3.343	1.94705
11	4.195	3.181	1.31877	11	6.714	3.076	2.1827
12	3.054	4.569	0.668418	12	5.285	3.044	1.7362
13	4.493	3.529	1.27317	13	4.157	3.038	1.36833
14	4.051	2.755	1.47042	14	5.358	3.041	1.76192
15	4.533	4.846	0.935411	15	6.233	3.277	1.90204
16	3.958	4.364	0.906966	16	5.014	4.218	1.18872
17	3.827	4.713	0.812009	17	5.092	3.316	1.53559
18	4.999	3.277	1.52548	18	6.837	5.051	1.35359
19	4.505	3.756	1.19941	19	6.869	2.806	2.44797
20	3.528	2.919	1.20863	20	6.518	4.879	1.33593
21	3.436	4.202	0.817706	21	4	3.608	1.10865
22	4.292	5.055	0.84906	22	4.11	3.535	1.16266
23	3.608	3.468	1.04037	23	5.689	4.506	1.26254
24	3.777	4.792	0.788189	24	6.514	3.781	1.72282
25	4.089	3.738	1.0939	25	6.974	3.622	1.92546
				26	5.944	3.952	1.50405
				27	5.05	3.982	1.26821
				28	5.095	3.206	1.58921
				29	5.222	2.644	1.97504
				30	5.016	3.696	1.35714
Figure 4L
Azidoblebbistatin experiments			RPE	Invagination angle in º
DMSO	Irradiated eye	Non-irradiated eye	I/NI	Ableb Phenotype	Irradiated eye	Non-irradiated eye	I/NI
1	89.946	86.593	1.03872	1	104.71	95.739	1.0937
2	89.796	99.235	0.904882	2	99.549	88.002	1.13121
3	131.122	130.424	1.00535	3	123.896	114.473	1.08232
4	97.187	98.396	0.987713	4	103.841	93.177	1.11445
5	116.631	120.471	0.968125	5	100.805	99.784	1.01023
6	128.717	115.543	1.11402	6	137.415	114.132	1.204
7	103.905	87.618	1.18589	7	123.241	91.076	1.35317
8	72.099	79.831	0.903145	8	118.952	96.151	1.23714
9	94.543	99.113	0.953891	9	128.723	121.489	1.05954
10	111.846	106.481	1.05038	10	115.648	113.369	1.0201
11	109.683	107.741	1.01802	11	116.151	112.694	1.03068
12	105.579	116.719	0.904557	12	134.728	119.891	1.12375
13	109.284	99.479	1.09856	13	128.931	121.39	1.06212
14	113.613	84.698	1.34139	14	133.726	136.413	0.980302
15	63.496	69.061	0.919419	15	148.853	149.794	0.993718
16	65.663	55.189	1.18978	16	120.471	104.257	1.15552
17	65.58	63.615	1.03089	17	124.618	125.151	0.995741
18	81.838	80.518	1.01639	18	106.837	112.457	0.950025
19	65.272	87.438	0.746495	19	104.283	81.783	1.27512
20	77.743	81.698	0.95159	20	108.027	102.031	1.05877
21	76.128	72.42	1.0512	21	96.166	83.978	1.14513
22	69.364	72.613	0.955256	22	85.601	74.273	1.15252
23	80.74	84.229	0.958577	23	103.431	98.471	1.05037
24	92.994	93.122	0.998625	24	100.816	103.862	0.970673
25	93.517	75.293	1.24204	25	114.091	99.802	1.14317
				26	95.412	85.912	1.11058
			1.0214	27	96.369	103.26	0.933266
				28	114.907	85.437	1.34493
				29	119.851	108.334	1.10631
				30	112.157	95.312	1.17674
Figure 4M
Azidoblebbistatin experiments			NR	A-B length in µm
DMSO	Irradiated eye	Non-irradiated eye	I/NI	ABlebPhenotype	Irradiated eye	Non-irradiated eye	I/NI
1	3.567	4.234	0.842466	1	3.69	3.622	1.01877
2	5.056	4.481	1.12832	2	5.009	5.944	0.842699
3	3.53	4.157	0.84917	3	3.531	4.209	0.838917
4	3.736	4.014	0.930742	4	6.822	5.763	1.18376
5	3.743	4.015	0.932254	5	4.448	3.749	1.18645
6	3.031	3.644	0.831778	6	4.226	3.588	1.17781
7	3.538	3.321	1.06534	7	6.105	5.458	1.11854
8	3.726	4.154	0.896967	8	4.664	4.048	1.15217
9	4.041	4.11	0.983212	9	3.469	3.464	1.00144
10	4.266	4.595	0.9284	10	3.347	3.159	1.05951
11	3.019	3.529	0.855483	11	3.871	3.751	1.03199
12	4.363	3.688	1.18303	12	3.992	4.649	0.858679
13	4.3	4.022	1.06912	13	3.901	3.449	1.13105
14	3.192	3.007	1.06152	14	2.98	4.209	0.708007
				15	3.232	5.648	0.572238
				16	3.681	4.14	0.88913
Figure 4N
Azidoblebbistatin experiments			NR	Invagination angle in º
DMSO	Irradiated eye	Non-irradiated eye	I/NI	ABlebPhenotype	Irradiated eye	Non-irradiated eye	I/NI
1	146.486	131.262	1.11598	1	132.699	111.955	1.18529
2	110.125	102.994	1.06924	2	102.883	90.948	1.13123
3	124.131	111.378	1.1145	3	137.229	107.639	1.2749
4	122.533	115.158	1.06404	4	139.279	106.773	1.30444
5	115.53	105.385	1.09627	5	157.928	120.471	1.31092
6	92.857	74.687	1.24328	6	155.762	129.355	1.20414
7	143.101	118.942	1.20312	7	134.236	109.414	1.22686
8	102.109	102.836	0.99293	8	172.656	149.974	1.15124
9	127.33	129.145	0.985946	9	144.643	101.529	1.42465
10	130.943	124.03	1.05574	10	145.178	103.908	1.39718
11	129.275	98.919	1.30688	11	119.427	103.35	1.15556
12	102.36	103.696	0.987116	12	130.105	119.008	1.09325
13	113.611	110.71	1.0262	13	136.869	109.029	1.25534
14	102.132	106.793	0.956355	14	129.9	123.441	1.05232
				15	151.069	107.462	1.40579
				16	140.197	96.606	1.45122
