# Supplementary material for: Stretching of the retinal pigment epithelium contributes to zebrafish optic cup morphogenesis
Source: eLife. 2021 Sep 21;10:e63396. doi: 10.7554/eLife.63396 (PMC8530511; doi:10.7554/eLife.63396)
Supplement: Figure 5—source data 1. [file elife-63396-fig5-data1.xlsx]

## Sheet: Figure 5I, J
Figure 5I
STMN1 injections		AB length in µm
uas:gfp		uas:stath
1	6.697	2	8.992
2	3.864	3	7.06
3	4.249	1	13.588
4	5.02	3	11.506
5	5.375	4	10.904
6	5.135	5	6.879
7	4.93	6	8.111
Figure 5J
STMN1 injections		Invagination angle in º
uas:gfp		uas:stath
1	118.445	2	131.626
2	99.116	3	137.086
3	121.3	1	125.26
4	107.852	3	128.005
5	115.796	4	117.597
6	116.184	5	126.755
7	94.613	6	133.996
