# Supplementary material for: Stretching of the retinal pigment epithelium contributes to zebrafish optic cup morphogenesis
Source: eLife. 2021 Sep 21;10:e63396. doi: 10.7554/eLife.63396 (PMC8530511; doi:10.7554/eLife.63396)
Supplement: Figure 6—source data 1. [file elife-63396-fig6-data1.xlsx]

## Sheet: Figure 6B
Figure 6B
Percentage of proliferating cells
embryo	GFP +	BrdU +	%
17hpf
1	16	8	50
2	20	10	50
3	27	18	66.6667
4	29	13	44.8276
5	29	16	55.1724
18 hpf
1	43	17	39.5349
2	82	21	25.6098
3	51	15	29.4118
4	42	19	45.2381
5	64	19	29.6875
19hpf
1	51	12	23.5294
2	81	18	22.2222
3	87	20	22.9885
4	88	17	19.3182
5	62	14	22.5806
20hpf
1	75	16	21.3333
2	87	19	21.8391
3	92	19	20.6522
4	81	21	25.9259
5	106	32	30.1887
21hpf
1	133	31	23.3083
2	113	29	25.6637
3	161	27	16.7702
4	143	24	16.7832
5	124	22	17.7419
24hpf
1	122	20	16.3934
2	148	21	14.1892
3	138	24	17.3913
4	146	24	16.4384
5	139	23	16.5468
30hpf
1	180	36	20
2	211	28	13.2701
3	202	41	20.297
4	191	41	21.466
5	224	59	26.3393
48hpf
1	287	39	13.5889
2	318	42	13.2075
3	220	27	12.2727
4	268	23	8.58209
5	301	46	15.2824
