# Supplementary material for: Stretching of the retinal pigment epithelium contributes to zebrafish optic cup morphogenesis
Source: eLife. 2021 Sep 21;10:e63396. doi: 10.7554/eLife.63396 (PMC8530511; doi:10.7554/eLife.63396)
Supplement: Figure 7—source data 1. [file elife-63396-fig7-data1.xlsx]

## Sheet: 7E
	embryo num	BRDU	Total		embryo num	BRDU	Total		embryo num	BRDU	Total
Medaka				st 21		11	16	st22-23		16	26
St 18-19	1	11	15			11	17			18	26
	2	12	16			12	16			16	32
	3	16	21			10	16			18	33
	4	11	19			16	19			10	30
		50	71			9	14			10	28
						9	15			88	175
						11	15
						13	22
						12	21
						10	20
						11	20
Mouse						135	211
E9.5				E10.5
	1	16	20		1	25	43	E11.5	embryo num	BrdU	tot
	1	18	31		1	23	44		1	29	54
	1	16	26		1	22	43			30	53
	1	21	27		1	29	46			33	57
	1	14	30		2	17	26			20	56
	3	20	25		2	17	30			24	59
	3	25	31		2	20	32			21	52
	3	19	27		2	22	36		2	20	54
	3	18	28		2	17	30			23	55
	3	17	26		3	19	39			26	49
	4	19	27		3	27	42			28	57
	4	14	22		3	14	25		3	18	51
	4	13	18		3	16	26			28	52
	4	16	24		3	15	28			33	58
	4	16	21		4	18	29		4	23	46
	5	14	17		4	23	34			27	47
	5	17	25		4	20	35			383	800
	5	13	17		4	13	17
	6	15	26		5	13	35
	6	18	24		5	18	34
	6	14	22		5	10	27
	6	19	25			398	701
		372	539
Chicken									emb1	18.25	12.75
	1	47	35		1	21	14		1	17	12
	2	26	17		2	19	13		2	17	14
	3	31	22		3	20	12		3	21	12
	4	33	21		4	25	13		4	18	13
	1	32	17		1	17	11		emb3	18.25	12.25
	2	28	20		2	20	10		1	17	11
	3	28	18		3	21	13		2	20	13
	4	32	17		4	22	19		3	18	12
		120	72		1	23	16		4	18	13
					2	26	19		emb3	17.75	12.25
					3	25	15		1	21	13
					4	21	17		2	18	13
					1	24	12		3	15	12
					2	21	17		4	17	11
					3	22	11		emb4	18.25	12
					4	21	12		1	17	10
									2	18	15
									3	19	11
									4	19	12
									emb5	17.25	9.5
									1	18	11
									2	18	8
									3	20	9
									4	13	10
									emb6	19.75	10.75
									1	22	12
									2	18	8
									3	19	12
									4	20	11

## Sheet: Hoja2
Zebra		23.99	16.19
Medaka	70.42	65.89	55.42
Pollo	69.6552	63.7544	64.0543
Ratón	69.4	61.25	47
human	85	70	77
	Zebrafish	Medaka	Chicken	Mouse	Human
Optic Vesicle	33.896	70.42	69.6552	69.4	85
Fold	23.99	65.89	63.7544	61.25	70
Optic Cup	16.19	55.42	64.0543	47	77
	A-B lenght um	% proliferation at OC
zebra	3	18
medaka	3.5	46
mouse	13	47
chick	15.8	66
human	33.6	75
