# Supplementary material for: Stretching of the retinal pigment epithelium contributes to zebrafish optic cup morphogenesis
Source: eLife journal article supplement (doi:10.7554/elife.63396), 2021-09-21

**A**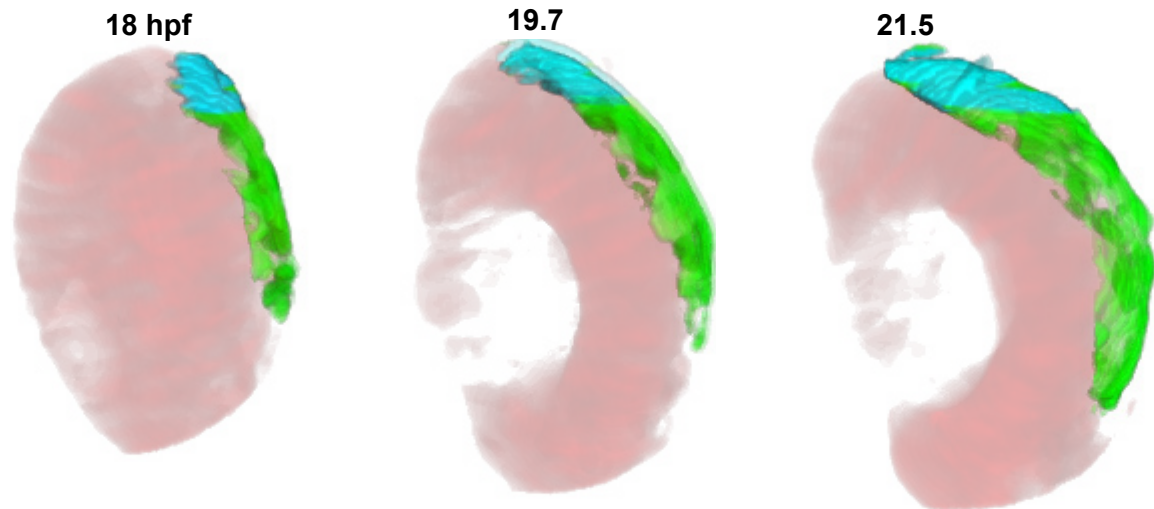**B**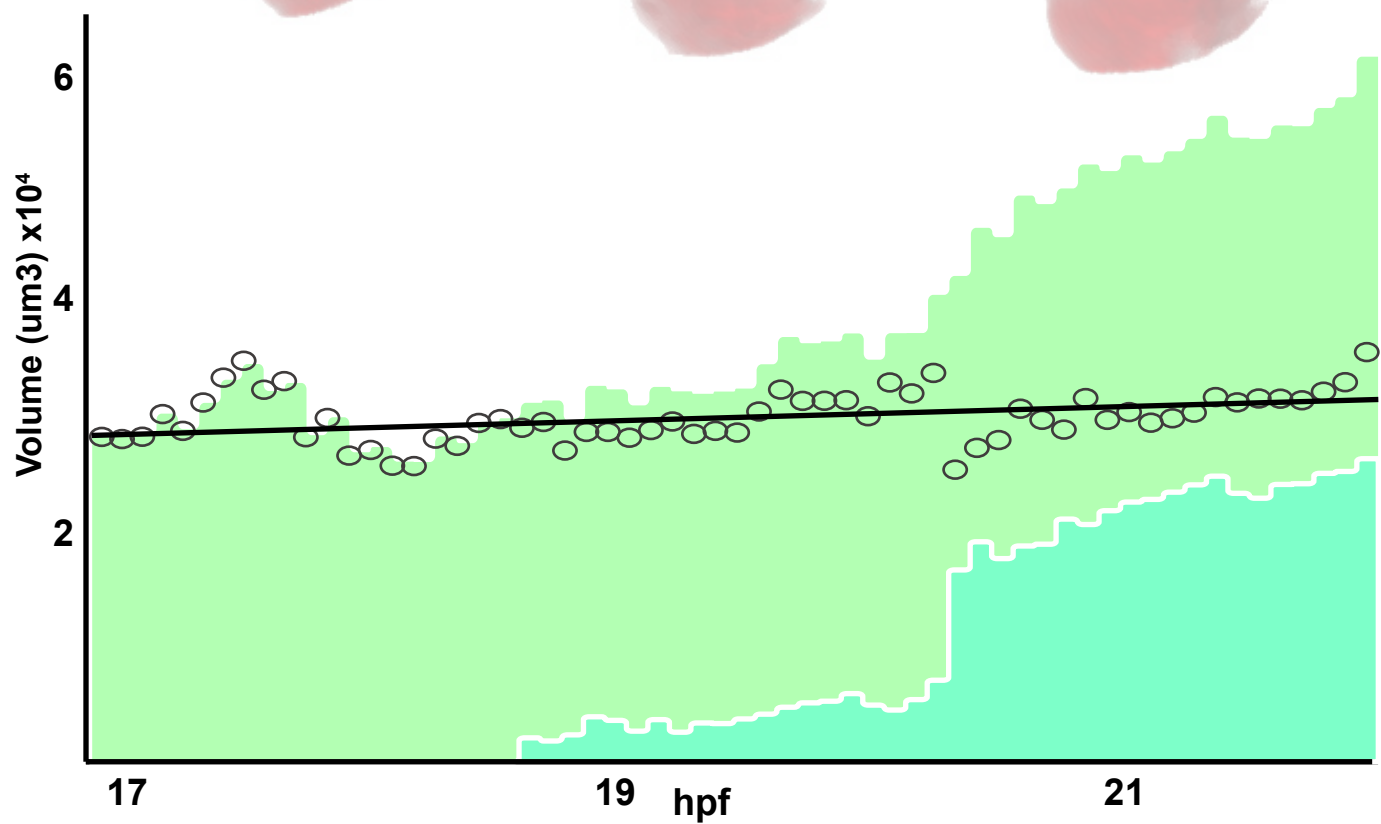

Supplement: supp [file elife-63396-supp-v1.zip]
